# Supplementary material for: High-pressure stabilization of open–shell bromine fluorides
Source: Royal Society of Chemistry journal article supplement (doi:10.1039/d3cp05020c), 2023-12-12
Supplement: d3cp05020c1.pdf [file d3cp05020c1.pdf]

## Supplementary information

### High-pressure stabilization of open-shell bromine fluorides

Madhavi H. Dalsaniya,<sup>\*a,b</sup> Deepak Upadhyay,<sup>b</sup> Krzysztof Jan Kurzydłowski<sup>a</sup> and Dominik Kurzydłowski<sup>\*b</sup>

<sup>a</sup> Faculty of Materials Science and Engineering, Warsaw University of Technology, Wołoska 141, 02-507, Warsaw, Poland

madhavi.dalsaniya.dokt@pw.edu.pl, krzysztof.kurzydowski@pw.edu.pl

<sup>b</sup> Faculty of Mathematics and Natural Sciences, Cardinal Stefan Wyszyński University in Warsaw, 01-038 Warsaw, Poland

d.upadhyay@uksw.edu.pl, d.kurzydowski@uksw.edu.pl

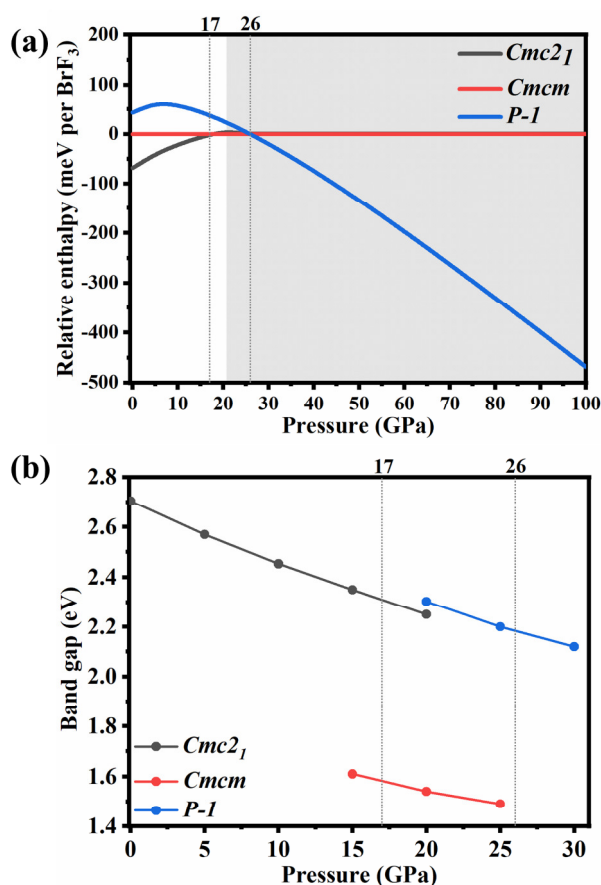

**Fig. S1** (a) Pressure dependence of the relative enthalpies of BrF<sub>3</sub> phases (relative to the Ccm structure); grey area denotes the pressure region in which BrF<sub>3</sub> becomes unstable with respect to decomposition into BrF<sub>2</sub> and BrF<sub>5</sub>; and (b) Calculated electronic band gap as a function of pressure for Cmc2<sub>1</sub>, Ccm, and P-1 phases (r<sup>2</sup>SCAN calculations).

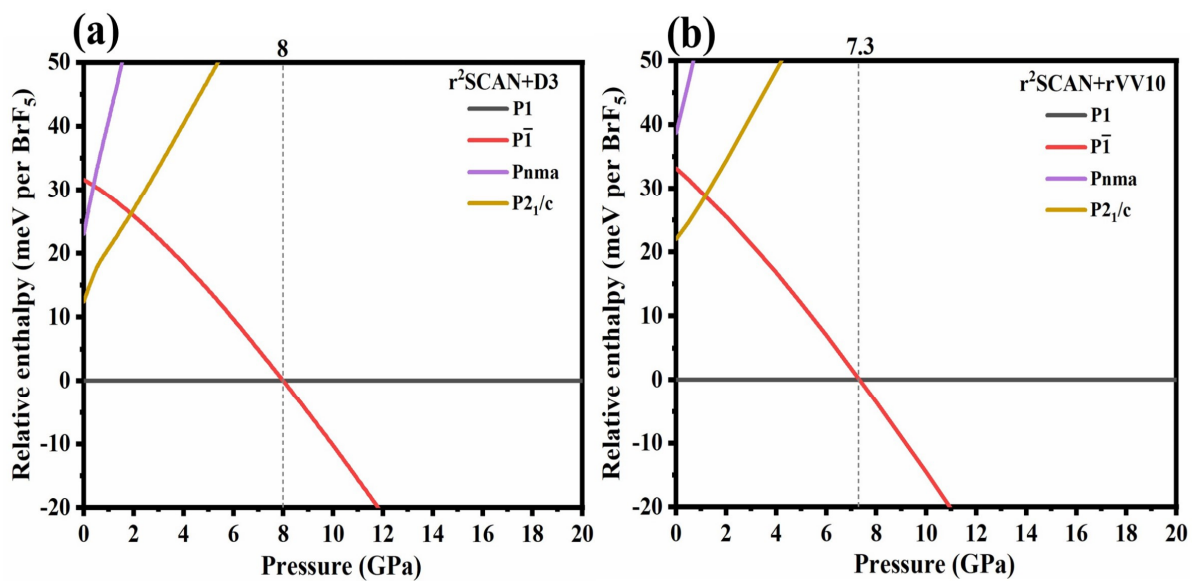

**Fig. S2** Pressure-dependent relative enthalpies of BrF<sub>5</sub> phases relative to the P1 structure calculated using (a) r<sup>2</sup>SCAN+D3 and (b) r<sup>2</sup>SCAN+rVV10

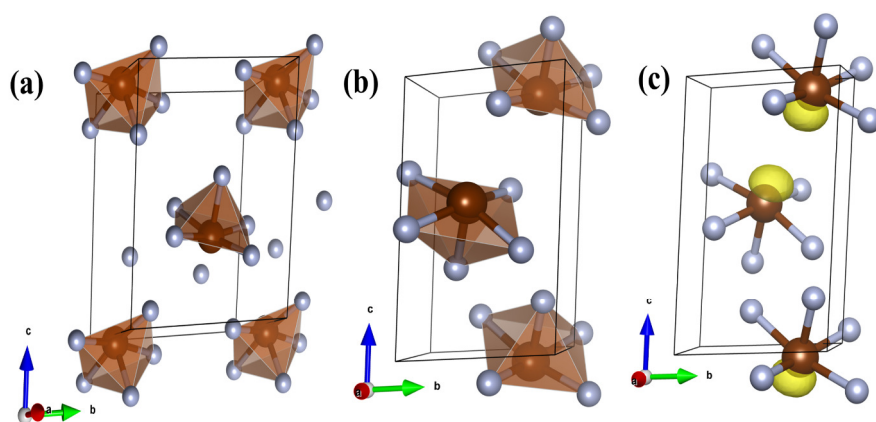

**Fig. S3** Crystal structures of BrF<sub>5</sub>: (a) P1 at 0 GPa; (b) P1̄ at 100 GPa; and the (c) Isosurface of the ELF function (at a value of 0.9) for P1̄ at 100 GPa.

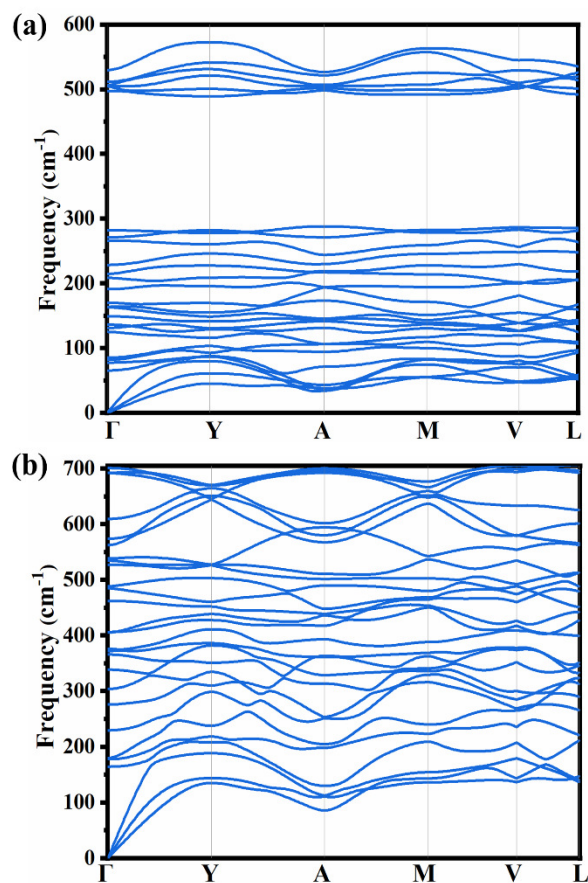

Fig. S4 Phonon dispersion curves of  $\text{BrF}_2$ ; (a)  $C2/m$  at 0 GPa and (b)  $C2/m$  at 100 GPa.

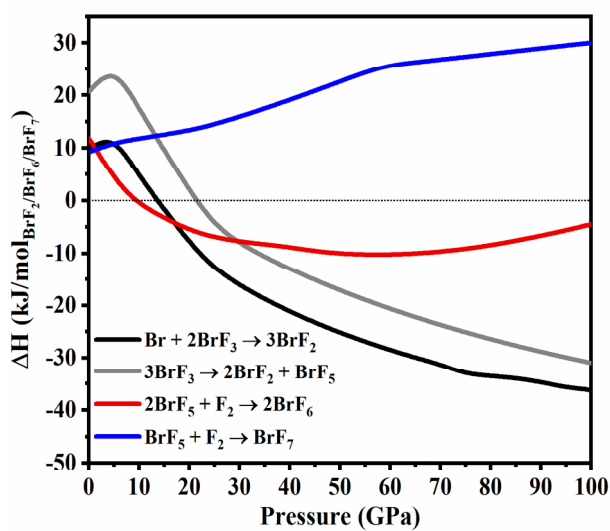

Fig. S5 Enthalpy of reactions leading to the formation of  $\text{BrF}_2$ ,  $\text{BrF}_6$ , and  $\text{BrF}_7$ , as a function of pressure.

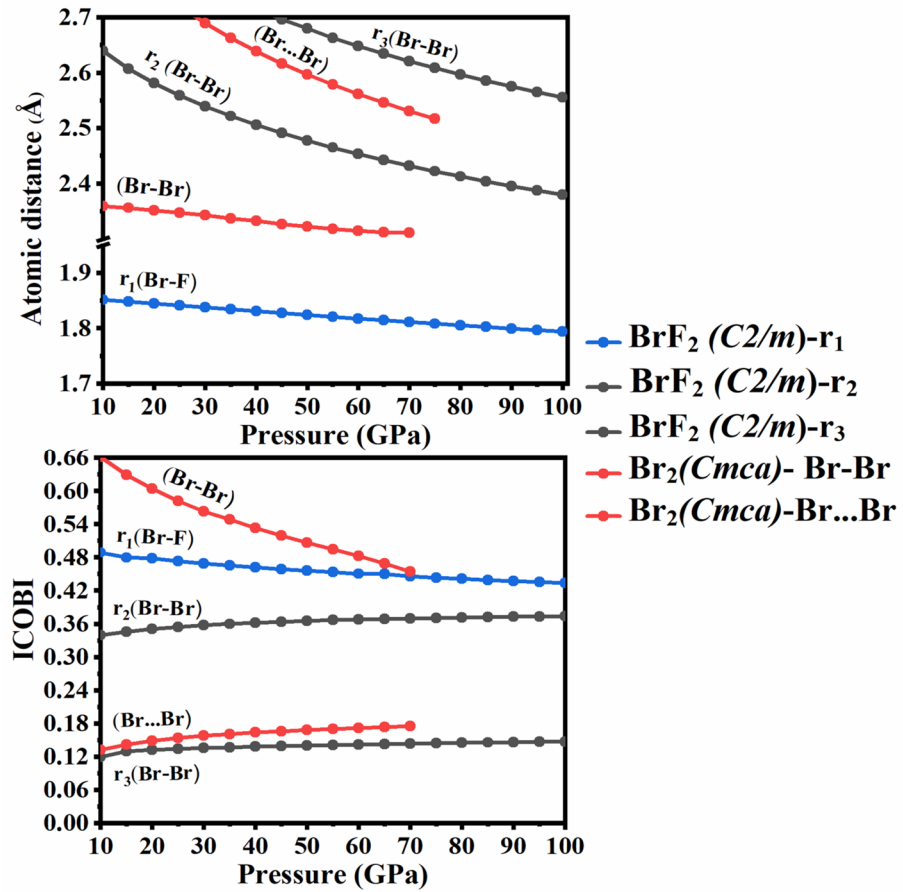

**Fig. S6** (a) Calculated interatomic distances as a function of pressure for  $C2/m$  phase of  $BrF_2$  with comparison of  $Cmca$  phase of  $Br_2$ ; and (b) Pressure dependence of the integrated crystal orbital bond index (ICOBI) for Br-F distances.

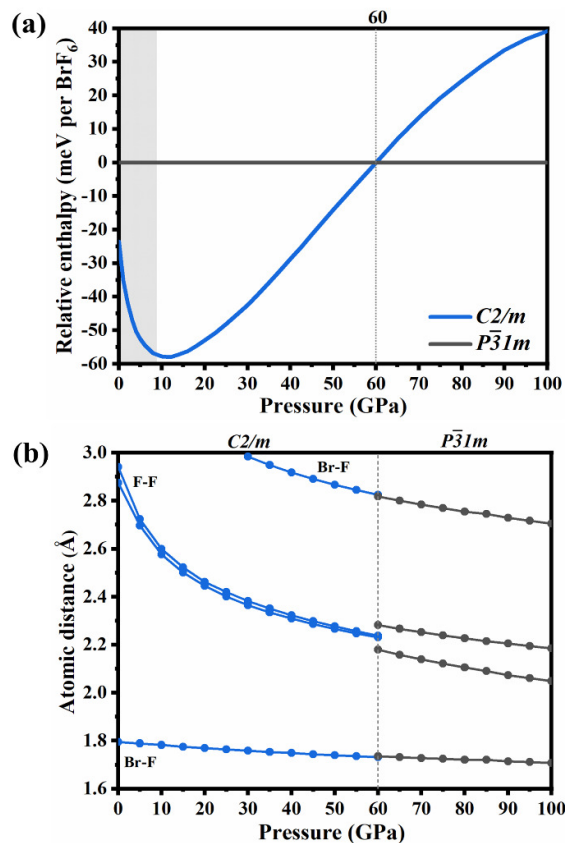

**Fig. S7** (a) Pressure-dependent relative enthalpy of the  $C2/m$  structure of  $\text{BrF}_6$  phases relative to the  $P\bar{3}1m$  polymorph, grey area denotes the pressure region in which  $\text{BrF}_6$  is thermodynamically unstable; (b) Calculated interatomic distances as a function of pressure for both phases in their region of stability.

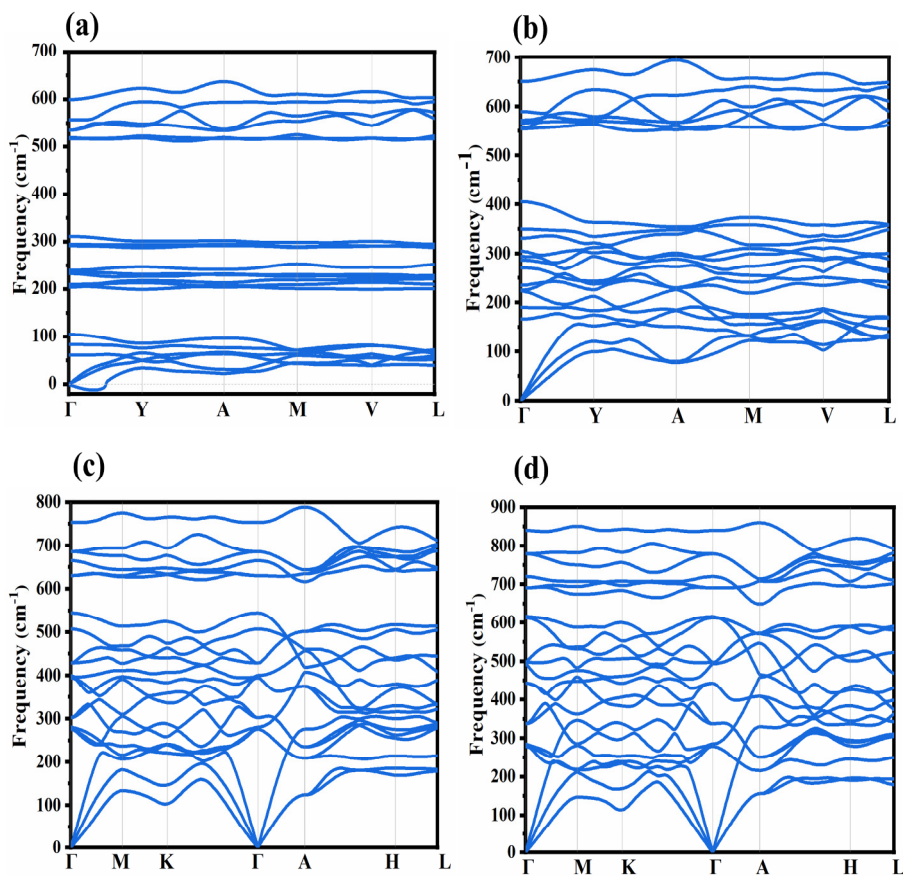

**Fig. S8** Phonon dispersion curves calculated for  $\text{BrF}_6$  in the  $C2/m$  at (a) 0 GPa and (b) 15 GPa, and in the  $P\bar{3}1m$  structure at (c) 60 GPa and (d) 100 GPa. Small imaginary frequencies around  $\Gamma$ -point in panel (a) are an artefact of the computational method.

**Table S1.** Comparison of Br-F distances ( $R_{\text{Br-F}}$ ) in Å and heats of formation ( $\Delta H_f$  at 0K) in kJ/mol calculated for isolated BrF, BrF<sub>3</sub>, and BrF<sub>5</sub> molecules.

| Molecule               | $R_{\text{Br-F}}$                  |                             |                            | $\Delta H_f$                       |                             |                            |
|------------------------|------------------------------------|-----------------------------|----------------------------|------------------------------------|-----------------------------|----------------------------|
|                        | r <sup>2</sup> SCAN<br>[this work] | CCSD(T)<br>[ <sup>1</sup> ] | Exp.<br>[ <sup>2-5</sup> ] | r <sup>2</sup> SCAN<br>[this work] | CCSD(T)<br>[ <sup>1</sup> ] | Exp.<br>[ <sup>2-5</sup> ] |
| <b>BrF</b>             | 1.771                              | 1.771                       | 1.759                      | -72                                | -56                         | -59 ± 2                    |
| <b>BrF<sub>3</sub></b> | 1.749                              | 1.730                       | 1.721                      | -319                               | -253                        | -256 ± 3                   |
|                        | 1.830                              | 1.817                       | 1.810                      |                                    |                             |                            |
| <b>BrF<sub>5</sub></b> | 1.730                              | 1.707                       | 1.700                      | -563                               | -445                        | -429 ± 2                   |
|                        | 1.793                              | 1.771                       | 1.768                      |                                    |                             |                            |

**Table S2.** Löwdin charges on bromine atoms for the most stable phases of bromine fluorides at 20 GPa.

| BrF stoichiometry                                       | Symmetry                     | $q(\text{Br})$ | $q_{\text{av}}(\text{Br})$ |
|---------------------------------------------------------|------------------------------|----------------|----------------------------|
| BrF (=Br·BrF <sub>2</sub> )                             | <i>Cmc2<sub>1</sub></i>      | 0.11 e, 1.00 e | 0.55 e                     |
| BrF <sub>2</sub>                                        | <i>C2/m</i>                  | 1.05 e, 1.04 e | 1.04 e                     |
| BrF <sub>3</sub>                                        | <i>Cmcm</i>                  | 1.46 e         | 1.46 e                     |
| BrF <sub>4</sub> (=BrF <sub>3</sub> ·BrF <sub>5</sub> ) | <i>P1</i>                    | 1.45 e, 2.31 e | 1.88 e                     |
| BrF <sub>5</sub>                                        | <i>P<math>\bar{1}</math></i> | 2.32 e         | 2.32 e                     |
| BrF <sub>6</sub>                                        | <i>C2/m</i>                  | 2.56 e         | 2.56 e                     |
| BrF <sub>7</sub> (=BrF <sub>6</sub> ·½F <sub>2</sub> )  | <i>P<math>\bar{1}</math></i> | 2.56 e         | 2.56 e                     |

**Table S3.** Structural details of bromine fluorides.

| Phase                                                      | Pressure (GPa) | Lattice parameters<br>(Å)                                                                                                     | Atomic coordinate           |
|------------------------------------------------------------|----------------|-------------------------------------------------------------------------------------------------------------------------------|-----------------------------|
| <b>BrF<sub>2</sub></b><br>( <i>C2/m</i> )                  | 15             | $a = 5.205$<br>$b = 6.149$<br>$c = 6.719$<br>$\alpha = \gamma = 90.000^\circ$<br>$\beta = 99.260^\circ$                       | Br 0.29642 0.00000 0.83010  |
|                                                            |                |                                                                                                                               | Br 0.00000 0.50000 0.50000  |
|                                                            |                |                                                                                                                               | F 0.82142 0.20021 0.83096   |
|                                                            |                |                                                                                                                               | F 0.00000 0.19966 0.50000   |
| <b>BrF<sub>2</sub></b><br>( <i>C2/m</i> )                  | 100            | $a = 4.472$<br>$b = 5.786$<br>$c = 5.937$<br>$\alpha = \gamma = 90.000^\circ$<br>$\beta = 100.494^\circ$                      | Br 0.27447 0.00000 0.83335  |
|                                                            |                |                                                                                                                               | Br 0.00000 0.50000 0.50000  |
|                                                            |                |                                                                                                                               | F 0.81180 0.19129 0.83199   |
|                                                            |                |                                                                                                                               | F 0.00000 0.18988 0.50000   |
| <b>BrF<sub>3</sub></b><br>( <i>Cmc2<sub>1</sub></i> )      | 0              | $a = 5.241$<br>$b = 7.449$<br>$c = 6.255$<br>$\alpha = \beta = \gamma = 90.000^\circ$                                         | Br 0.00000 0.65976 0.56492  |
|                                                            |                |                                                                                                                               | F 0.00000 0.76091 0.82131   |
|                                                            |                |                                                                                                                               | F 0.00000 0.88046 0.44844   |
|                                                            |                |                                                                                                                               | F 0.00000 0.42375 0.72732   |
| <b>BrF<sub>3</sub></b><br>( <i>Cmcm</i> )                  | 20             | $a = 4.741$<br>$b = 6.108$<br>$c = 5.966$<br>$\alpha = \beta = \gamma = 90.000^\circ$                                         | Br 0.00000 0.85135 0.2500   |
|                                                            |                |                                                                                                                               | F 0.00000 0.1917 0.44079    |
|                                                            |                |                                                                                                                               | F 0.00000 0.56681 0.2500    |
|                                                            |                |                                                                                                                               |                             |
| <b>BrF<sub>3</sub></b><br>( <i>P<math>\bar{1}</math></i> ) | 25             | $a = 3.957$<br>$b = 4.029$<br>$c = 5.5003$<br>$\alpha = 86.6279^\circ$<br>$\beta = 77.5542^\circ$<br>$\gamma = 73.3234^\circ$ | Br 0.6356 0.24515 0.79084   |
|                                                            |                |                                                                                                                               | F 0.42544 0.66719 0.68602   |
|                                                            |                |                                                                                                                               | F -0.05848 0.76736 0.39509  |
|                                                            |                |                                                                                                                               | F 0.16409 0.21221 0.05419   |
| <b>BrF<sub>5</sub></b><br>( <i>P1</i> )                    | 0              | $a = 4.753$<br>$b = 5.318$<br>$c = 7.149$<br>$\alpha = 87.102^\circ$<br>$\beta = 71.5168^\circ$<br>$\gamma = 80.2046^\circ$   | Br 0.53129 0.02779 -0.02889 |
|                                                            |                |                                                                                                                               | Br 0.85342 0.52966 0.34709  |
|                                                            |                |                                                                                                                               | F 0.62445 0.83775 0.39913   |
|                                                            |                |                                                                                                                               | F -0.08581 0.56576 0.56886  |
|                                                            |                |                                                                                                                               | F 0.36048 0.87922 0.82751   |
|                                                            |                |                                                                                                                               | F 0.3477 0.33336 -0.08142   |
|                                                            |                |                                                                                                                               | F 0.18464 0.68368 0.24432   |
|                                                            |                |                                                                                                                               | F 0.09903 0.22412 0.33682   |
| F 0.8047 0.06477 0.75038                                   |                |                                                                                                                               |                             |

|                                                    |     |                                                                                                                              |                                                                                                                                                                          |
|----------------------------------------------------|-----|------------------------------------------------------------------------------------------------------------------------------|--------------------------------------------------------------------------------------------------------------------------------------------------------------------------|
|                                                    |     |                                                                                                                              | F 0.77104 0.72486 -0.01785<br>F 0.5414 0.3863 0.48913<br>F 0.7594 0.1865 0.07532                                                                                         |
| <b>BrF<sub>5</sub></b><br>( <i>P</i> $\bar{1}$ )   | 8   | $a = 4.420$<br>$b = 4.816$<br>$c = 6.931$<br>$\alpha = 80.278^\circ$<br>$\beta = 82.882^\circ$<br>$\gamma = 64.815^\circ$    | Br 0.18878 0.7007 0.70888<br>F 0.21596 0.05705 0.59117<br>F 0.19469 0.36484 0.86083<br>F 0.64263 0.50507 0.65821<br>F 0.22326 0.07425 0.2054<br>F 0.69988 0.2182 0.08589 |
| <b>BrF<sub>5</sub></b><br>( <i>P</i> $\bar{1}$ )   | 100 | $a = 3.711$<br>$b = 3.951$<br>$c = 6.133$<br>$\alpha = 84.4994^\circ$<br>$\beta = 88.2614^\circ$<br>$\gamma = 70.8106^\circ$ | Br 0.15909 0.66974 0.70505<br>F 0.23646 0.07104 0.58052<br>F 0.1520 0.31629 0.88297<br>F 0.6654 0.47970 0.6509<br>F 0.24635 0.04187 0.20654<br>F 0.66549 0.23881 0.07144 |
| <b>BrF<sub>6</sub></b><br>( <i>C</i> $2/m$ )       | 15  | $a = 4.413$<br>$b = 7.580$<br>$c = 4.379$<br>$\alpha = \gamma = 90.000^\circ$<br>$\beta = 109.928^\circ$                     | Br 0.00000 0.50000 0.50000<br>F 0.75539 0.33520 0.24476<br>F 0.25015 0.00000 0.74296                                                                                     |
| <b>BrF<sub>6</sub></b><br>( <i>C</i> $2/m$ )       | 60  | $a = 4.049$<br>$b = 7.019$<br>$c = 4.053$<br>$\alpha = \gamma = 90.000^\circ$<br>$\beta = 109.232^\circ$                     | Br 0.00000 0.50000 0.50000<br>F 0.74028 0.32556 0.23798<br>F 0.23680 0.00000 0.76224                                                                                     |
| <b>BrF<sub>6</sub></b><br>( <i>P</i> $\bar{3}1m$ ) | 60  | $a = b = 4.0469$<br>$c = 3.819$<br>$\alpha = \beta = 90.000^\circ$<br>$\gamma = 120.000^\circ$                               | Br 0.00000 0.00000 0.00000<br>F 0.34946 0.00000 0.73659                                                                                                                  |
| <b>BrF<sub>6</sub></b><br>( <i>P</i> $\bar{3}1m$ ) | 100 | $a = b = 3.910$<br>$c = 3.688$<br>$\alpha = \beta = 90.000^\circ$<br>$\gamma = 120.000^\circ$                                | Br 0.00000 0.00000 0.00000<br>F 0.35610 0.00000 0.73206                                                                                                                  |

## References

- 1 K. S. Thanthiriwatte, M. Vasiliu, D. a Dixon and K. O. Christe, *Inorg. Chem.*, 2012, **51**, 10966–10982.
- 2 R. E. Willis and W. W. Clark, *J. Chem. Phys.*, 1980, **72**, 4946–4950.
- 3 K. P. Huber and G. Herzberg, *Molecular Spectra and Molecular Structure*, Springer US, Boston, MA, 1979, vol. 1999.
- 4 D. W. Magnuson, *J. Chem. Phys.*, 1957, **27**, 223–226.
- 5 R. D. Burbank and F. N. Bensey, *J. Chem. Phys.*, 1957, **27**, 982–983.
